# Supplementary material for: Emplacement age of the Sevier gravity slide, Utah, USA
Source: Copernicus journal article supplement (doi:10.5194/gchron-7-35-2025), 2025-02-24
Supplement: Supplementary file 1 [file gchron-7-35-2025-supplement.zip]

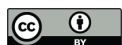

## *Supplement of*

# **Emplacement age of the Sevier gravity slide, Utah, USA**

**Tiffany Rivera et al.**

*Correspondence to:* Tiffany Rivera (trivera@missouri.edu)

- gchron-7-35-2025-supplement-title-page.pdf
- Rivera\_SGS\_GChron\_sup.pdf
- Rivera\_supp\_tables.xlsx

The copyright of individual parts of the supplement might differ from the article licence.
